# Supplementary material
Source: PubMed Central journal article supplement (PMC8730473)
Supplement: NIHMS1672772-supplement-Supplementary_Materials__figures__tables.pdf [file NIHMS1672772-supplement-Supplementary_Materials__figures__tables.pdf]

## Supplementary Figure Legends

**Supplementary Figure 1:** Repeated SNC80 prevents the development of acute and chronic NTG-induced peripheral allodynia. A separate group of mice were tested as described in Figure 1, but hind paw mechanical responses were measured. (A) Over 9 days, NTG-VEH mice developed a chronic peripheral allodynia as measured before treatment on that day, an effect not observed in NTG-SNC80 treated mice.  $p < 0.001$  effect of treatment, time, and interaction, three-way ANOVA, Holm-Sidak post hoc analysis,  $***p < 0.001$  relative to VEH-VEH on that day. (D) On each test day, NTG evoked acute allodynia, 2 hours post-injection, an effect that was not observed in the NTG-SNC80 treated groups.  $n = 8/\text{group}$ . DOP activation prevents the development of acute and chronic peripheral allodynia associated with chronic migraine.

**Supplementary Figure 2:** Chronic NTG results in acute and chronic cephalic allodynia in DOPeGFP mice. A separate group of DOPeGFP mice were tested with chronic vehicle (VEH) or NTG (10 mg/kg IP). (A) Over 9 days, NTG mice developed a chronic cephalic allodynia as measured before treatment on days 1, 5, and 9.  $p < 0.05$  treatment and interaction, two-way RM ANOVA, Holm-Sidak post hoc analysis,  $***p < 0.001$  relative to VEH on that day. (b) On each test day, NTG also evoked acute allodynia, 2 hours post-injection.  $**p < 0.001$  effect of treatment, two-way RM ANOVA,  $n = 5/\text{group}$ .

**Supplementary Figure 3:** DOP is co-expressed with NF200, a marker of myelinated afferents. Representative image of DOP, IB4, and NF200 in trigeminal ganglia from DOPeGFP mice. Filled in arrowhead show DOP+ cells, outlined arrowhead show IB4+

cells, filled arrows show NF200+ cells, and outlined chevrons show DOP+/NF200+ cells. There is a high co-expression between DOP and NF200, and little co-expression of IB4 with either of these markers.

**Supplementary Figure 4:** A proposed mechanism through which DOP agonists could inhibit migraine-associated pain. (A) The scheme summarizes the expression profiles of DOP, CGRP and CGRP receptor components observed in this study. We found co-expression between DOP and CRGP and DOP and the CGRP receptor component RAMP1 in trigeminal ganglia. We also observed that in the trigeminal nucleus caudalis CGRP was highly expressed in superficial lamina while DOP was expressed throughout the TNC. In the TNC there was high co-expression between DOP and the CGRP receptor components RAMP1 and/or CRLR. (B) We propose that inhibition of CGRP release and CGRP receptor signal propagation by DOP agonists could prevent the positive feedback loop which results in increased CGRP and chronic migraine associated pain.

A

Basal - peripheral

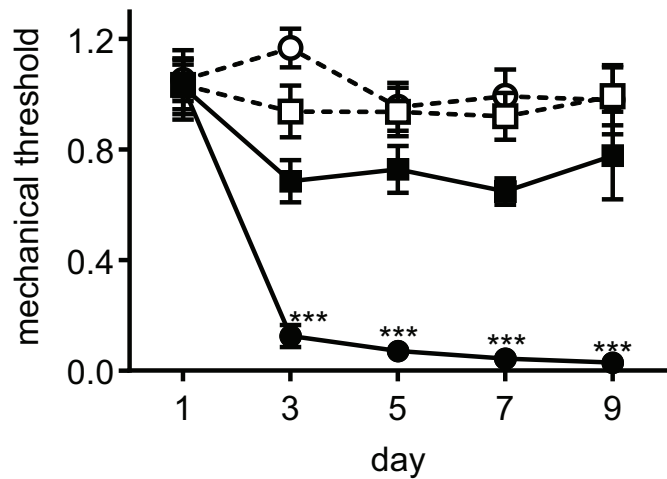

B

Post-SNC80 - peripheral

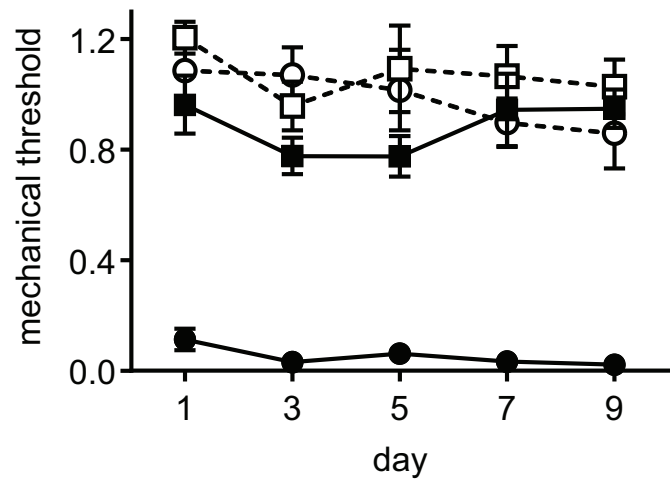

Supplementary Figure 1

A

## Basal Responses

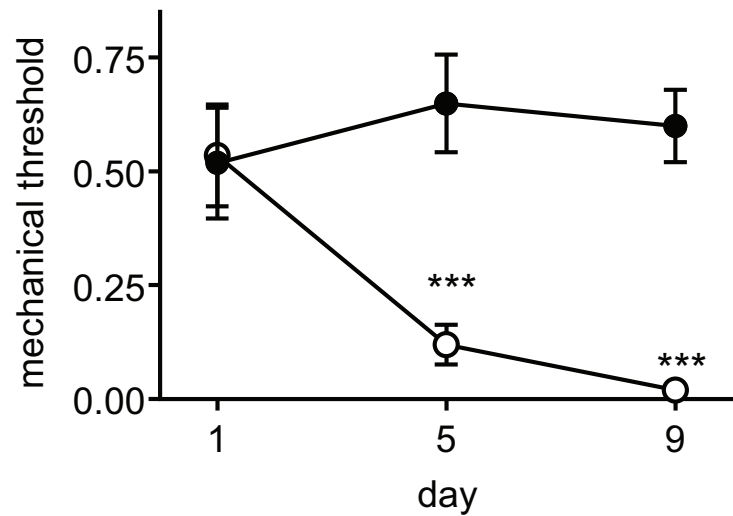

B

## Post-treatment Responses

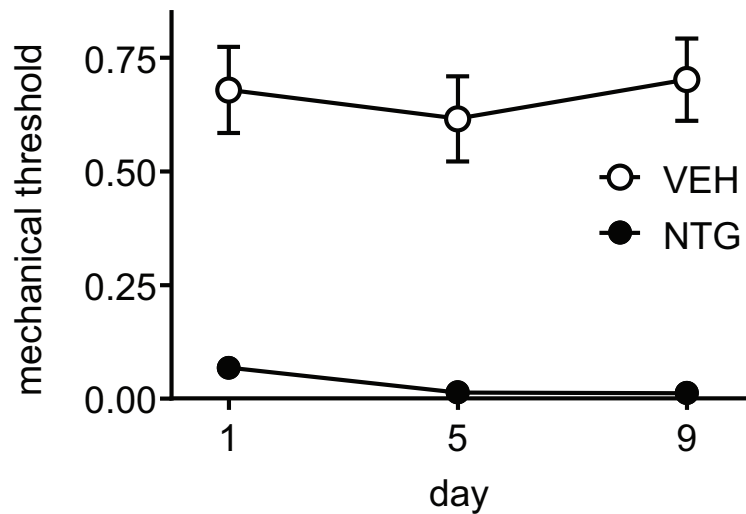

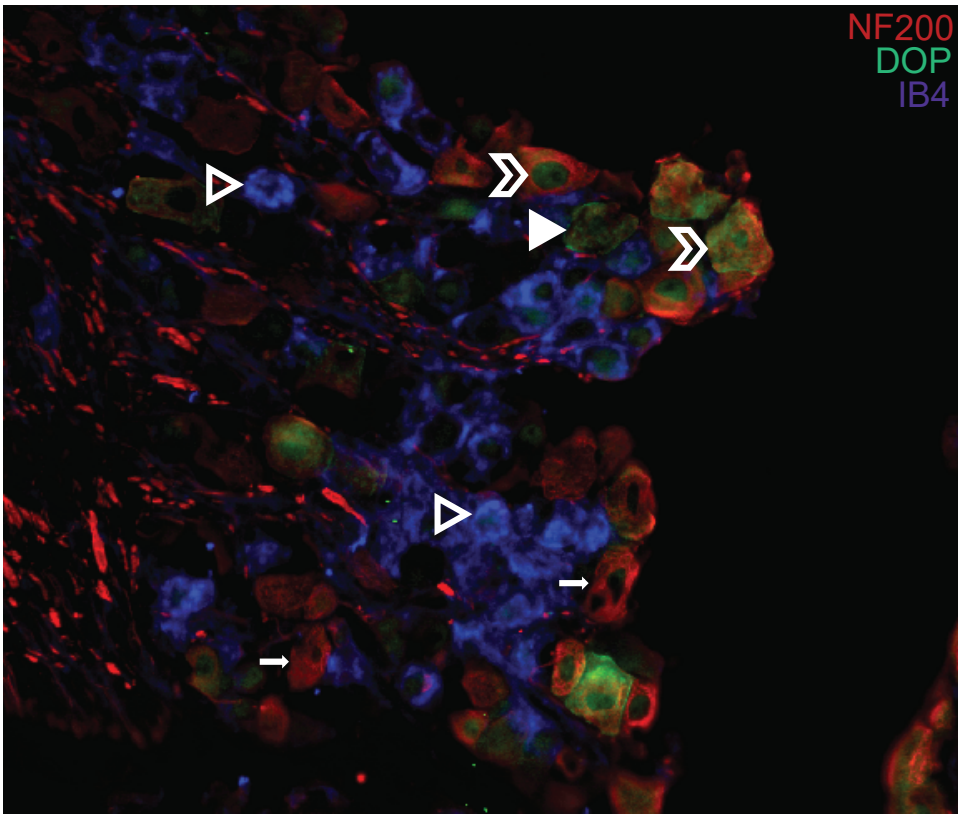

Supplementary Figure 3

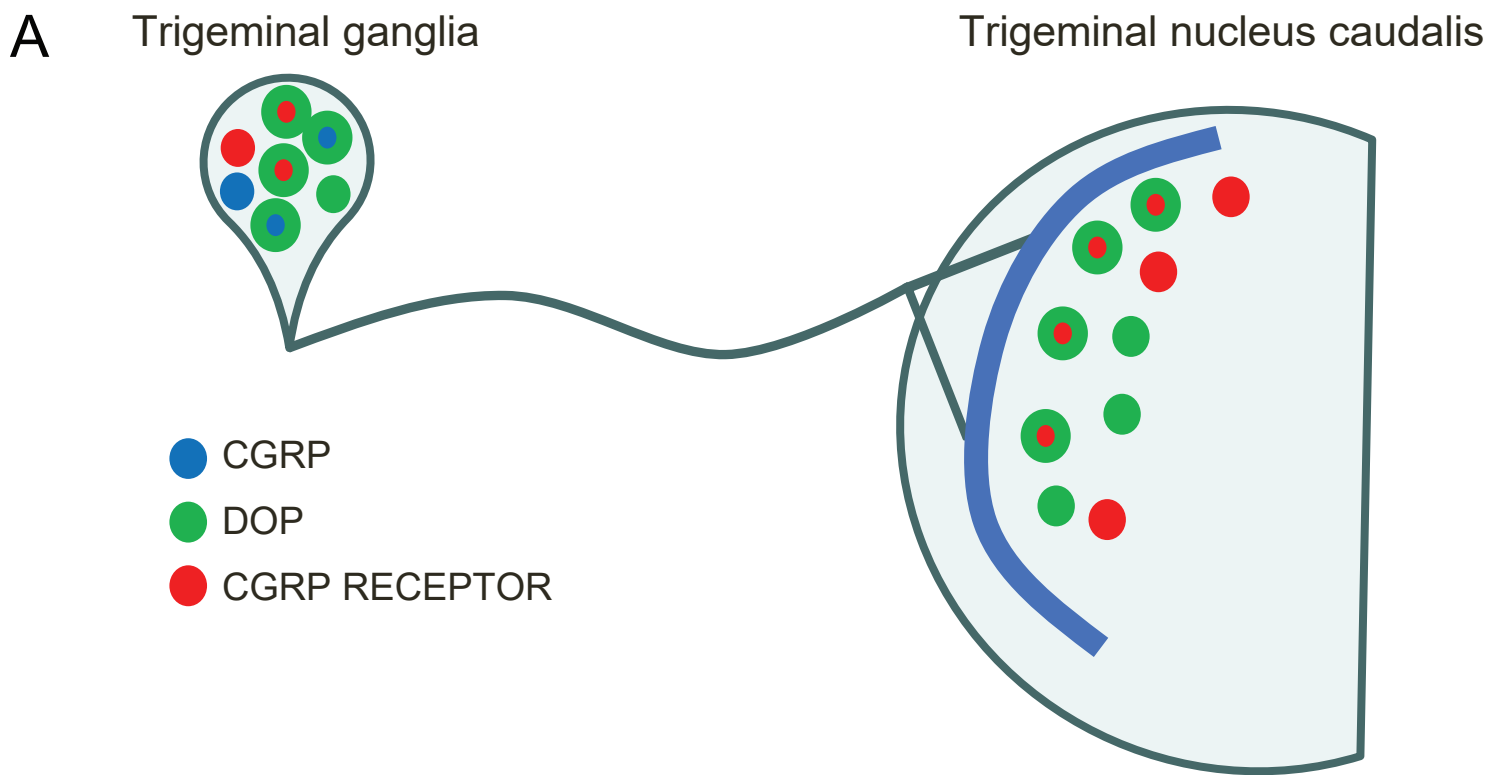

**B** DOP Activation Inhibits CGRP Release from TG

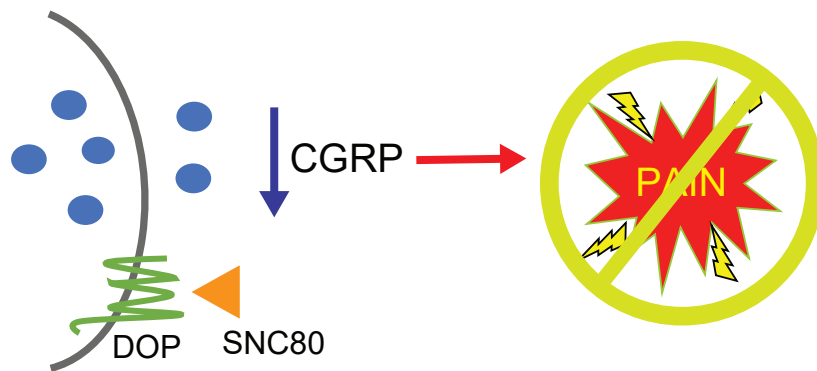

DOP Activation Inhibits CGRP Receptor Signaling

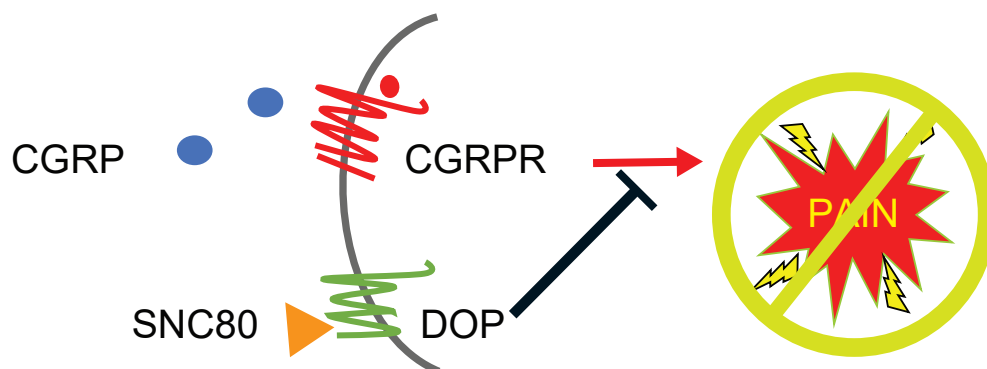

## Supplementary Table 1: Statistical Analysis

### Mixed Effects Model

| Figure    | Time    |       |          | Veh-NTG |       |          | Saline-SNC80 |       |          | Time Veh-NTG |        |          | Time Saline-SNC80 |       |          | Veh-NTG Saline-SNC80 |       |          | Interaction |         |          |
|-----------|---------|-------|----------|---------|-------|----------|--------------|-------|----------|--------------|--------|----------|-------------------|-------|----------|----------------------|-------|----------|-------------|---------|----------|
|           | Dfn,dfd | F     | p        | Dfn,dfd | F     | p        | Dfn,dfd      | F     | p        | Dfn,dfd      | F      | p        | Dfn,dfd           | F     | p        | Dfn,dfd              | F     | p        | Dfn,dfd     | F       | p        |
| <b>1C</b> | 2, 15   | 6.794 | p=0.0079 | 1, 15   | 51.77 | p<0.0001 | 1, 15        | 56.01 | p<0.0001 | 2, 15        | 12.53  | p=0.0006 | 2, 15             | 14.06 | p=0.0004 | 1, 14                | 76.54 | p<0.0001 | 2, 14       | 19.38   | p<0.0001 |
| <b>1D</b> | 2, 15   | 2.031 | p=0.1658 | 1, 15   | 206.9 | p<0.0001 | 1, 15        | 148.0 | p<0.0001 | 2, 15        | 0.1321 | p=0.8773 | 2, 15             | 2.577 | p=0.1091 | 1, 14                | 198.6 | p<0.0001 | 2, 14       | 0.01287 | p=0.9872 |

3M+3F in each group

### Three-Way ANOVA

| Figure         | Time    |       |          | Veh-NTG |       |          | Saline-SNC80 |       |          | Time Veh-NTG |        |          | Time Saline-SNC80 |        |          | Veh-NTG Saline-SNC80 |       |          | Interaction |        |          |
|----------------|---------|-------|----------|---------|-------|----------|--------------|-------|----------|--------------|--------|----------|-------------------|--------|----------|----------------------|-------|----------|-------------|--------|----------|
|                | Dfn,dfd | F     | p        | Dfn,dfd | F     | p        | Dfn,dfd      | F     | p        | Dfn,dfd      | F      | p        | Dfn,dfd           | F      | p        | Dfn,dfd              | F     | p        | Dfn,dfd     | F      | p        |
| <b>Supp 1A</b> | 4, 35   | 11.28 | p<0.0001 | 1, 35   | 157.9 | p<0.0001 | 1, 35        | 33.43 | p<0.0001 | 4, 35        | 9.399  | p<0.0001 | 4, 35             | 3.110  | P=0.0273 | 1, 35                | 60.06 | p<0.0001 | 4, 35       | 3.601  | P=0.0146 |
| <b>Supp 1B</b> | 4, 35   | 2.229 | p=0.0858 | 1, 35   | 214.9 | p<0.0001 | 1, 35        | 84.88 | p<0.0001 | 4, 35        | 0.8626 | p=0.4959 | 4, 35             | 0.7926 | P=0.5380 | 1, 35                | 74.47 | p<0.0001 | 4, 35       | 0.1643 | p=0.9551 |

3M+3F in each group

### Two-Way ANOVA

| Figure         | Vehicle vs NTG |       |         | Vehicle vs SNC80 |        |        | Interaction |        |        | M/F            |
|----------------|----------------|-------|---------|------------------|--------|--------|-------------|--------|--------|----------------|
|                | Dfn,dfd        | F     | p       | Dfn,dfd          | F      | p      | Dfn,dfd     | F      | p      |                |
| <b>2B</b>      | 1, 16          | 5.290 | 0.0352  | 1, 16            | 9.349  | 0.0075 | 1, 16       | 5.202  | 0.0366 | 3/3 each group |
| <b>2C</b>      | 1, 16          | 25.70 | 0.0001  | 1, 16            | 13.59  | 0.0020 | 1, 16       | 12.00  | 0.0032 |                |
| <b>2E</b>      | 1, 12          | 5.012 | 0.0449  | 1, 12            | 19.44  | 0.0009 | 1, 12       | 4.072  | 0.0665 |                |
|                | Veh/NTG        |       |         | Time             |        |        | Interaction |        |        |                |
|                | Dfn,dfd        | F     | p       | Dfn,dfd          | F      | p      | Dfn,dfd     | F      | p      |                |
| <b>Supp 2A</b> | 1, 8           | 9.545 | 0.0149  | 2, 16            | 2.320  | 0.1304 | 2, 16       | 3.397  | 0.0589 | 3/2 each group |
| <b>Supp 2B</b> | 1, 8           | 86.20 | <0.0001 | 2, 14            | 0.2956 | 0.7125 | 2, 16       | 0.1519 | 0.8603 |                |

**Unpaired t-test; two-tailed**

| Figure | F test to compare variances |       |        | Unpaired t Test |        |    | M/F                     |
|--------|-----------------------------|-------|--------|-----------------|--------|----|-------------------------|
|        | dfn, dfd                    | F     | P      | P               | T      | df |                         |
| 3C     | 5,5                         | 1.340 | 0.7562 | 0.0041          | 3.703  | 10 | 3/3 each group          |
| 3D     | 5,5                         | 13.84 | 0.0119 | 0.0004          | 5.143  | 10 |                         |
| 3E     | 5,5                         | 44.02 | 0.0008 | 0.0442          | 2.300  | 10 |                         |
| 3F     | 5,5                         | 36.66 | 0.0012 | 0.0121          | 3.055  | 10 |                         |
| 3G     | 5,5                         | 1.2   | 0.8647 | 0.9979          | 0.0027 | 10 |                         |
| 3H     | 5,5                         | 1.8   | 0.5379 | 0.9203          | 0.10   | 10 |                         |
| 4C     | 5,5                         | 2.5   | 0.3360 | 0.0258          | 2.6    | 10 | 3/3 each group          |
| 4D     | 5,5                         | 2.7   | 0.3002 | 0.8532          | 0.19   | 10 |                         |
| 4F     | 5,5                         | 2.6   | 0.3100 | <0.0001         | 7.1    | 10 |                         |
| 4G     | 5,5                         | 1.1   | 0.9062 | 0.0100          | 3.2    | 10 |                         |
| 5B     | 5,5                         | 4.4   | 0.1294 | 0.0762          | 2.0    | 10 | 3/3 each group          |
| 5C     | 5,5                         | 1.1   | 0.9373 | 0.4797          | 0.73   | 10 |                         |
| 5D     | 5,5                         | 3.8   | 0.1684 | 0.3347          | 1.0    | 10 |                         |
| 6A     | 5,5                         | 4.1   | 0.1494 | 0.9555          | 0.057  | 10 | 4/2 vehicle;<br>2/4 NTG |
| 6B     | 5,5                         | 2.568 | 0.3238 | 0.0617          | 2.103  | 10 |                         |
| 6C     | 5,5                         | 1.508 | 0.6632 | 0.2227          | 1.300  | 10 |                         |
| 6D     | 5,5                         | 1.506 | 0.6644 | 0.9531          | 0.0604 | 10 |                         |
